# Supplementary material for: Improving the Processability and Performance of Micronized Fiber-Reinforced Green Composites through the Use of Biobased Additives
Source: MDPI journal article supplement (doi:10.3390/polym14173451), 2022-08-24
Supplement: s1 [file s1]

# Improving the Processability and Performance of Micronized Fiber-Reinforced Green Composites through the Use of Biobased Additives

Bruno F. A. Valente <sup>1</sup>, Armando J. D. Silvestre <sup>1</sup>, Carlos Pascoal Neto <sup>2</sup>, Carla Vilela <sup>1</sup> and Carmen S. R. Freire <sup>1,\*</sup>

<sup>1</sup> CICECO–Aveiro Institute of Materials, Department of Chemistry, University of Aveiro, 3810-193 Aveiro, Portugal

<sup>2</sup> RAIZ, Research Institute of Forest and Paper (The Navigator Company), Rua José Estevão, Eixo, 3800-783 Aveiro, Portugal

\* Correspondence: cfreire@ua.pt

## Fourier Transform Infrared-Attenuated Total Reflection

Fourier Transform Infrared-Attenuated Total Reflection (FTIR-ATR) spectra were obtained on a Perkin-Elmer FT-IR System Spectrum BX spectrophotometer (Perkin-Elmer Inc., Waltham, MA, USA) equipped with a single horizontal Golden Gate ATR cell, over the range of 600–4000 cm<sup>−1</sup> at a resolution of 4 cm<sup>−1</sup> over 32 scans.

**Citation:** Valente, B.F.A.; Silvestre, A.J.D.; Neto, C.P.; Vilela, C.; Freire, C.S.R. Improving the Processability and Performance of Micronized Fiber-Reinforced Green Composites through the Use of Biobased Additives. *Polymers* **2022**, *14*, 3451. <https://doi.org/10.3390/polym14173451>

Academic Editor: Evgenia G. Korzhikova-Vlakh

Received: 08 July 2022

Accepted: 12 August 2022

Published: 24 August 2022

**Publisher's Note:** MDPI stays neutral with regard to jurisdictional claims in published maps and institutional affiliations.

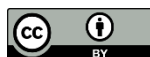

**Copyright:** © 2022 by the authors. Licensee MDPI, Basel, Switzerland. This article is an open access article distributed under the terms and conditions of the Creative Commons Attribution (CC BY) license (<https://creativecommons.org/licenses/by/4.0/>).

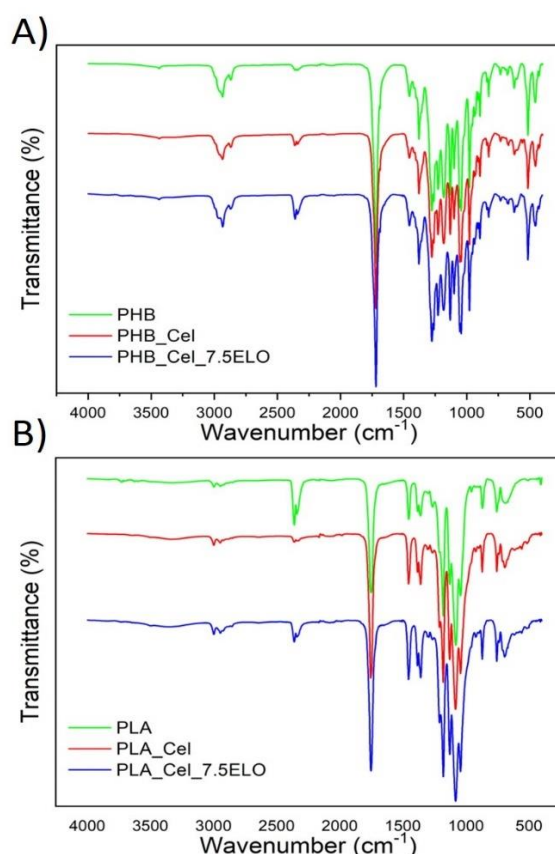

**Figure S1.** FTIR-ATR spectra of PHB, PHB\_Cel and PHB\_Cel 7.5 wt.% ELO (A) and PLA, PLA\_Cel and PLA\_Cel 7.5 wt.% ELO (B).

### Differential Scanning Calorimetry

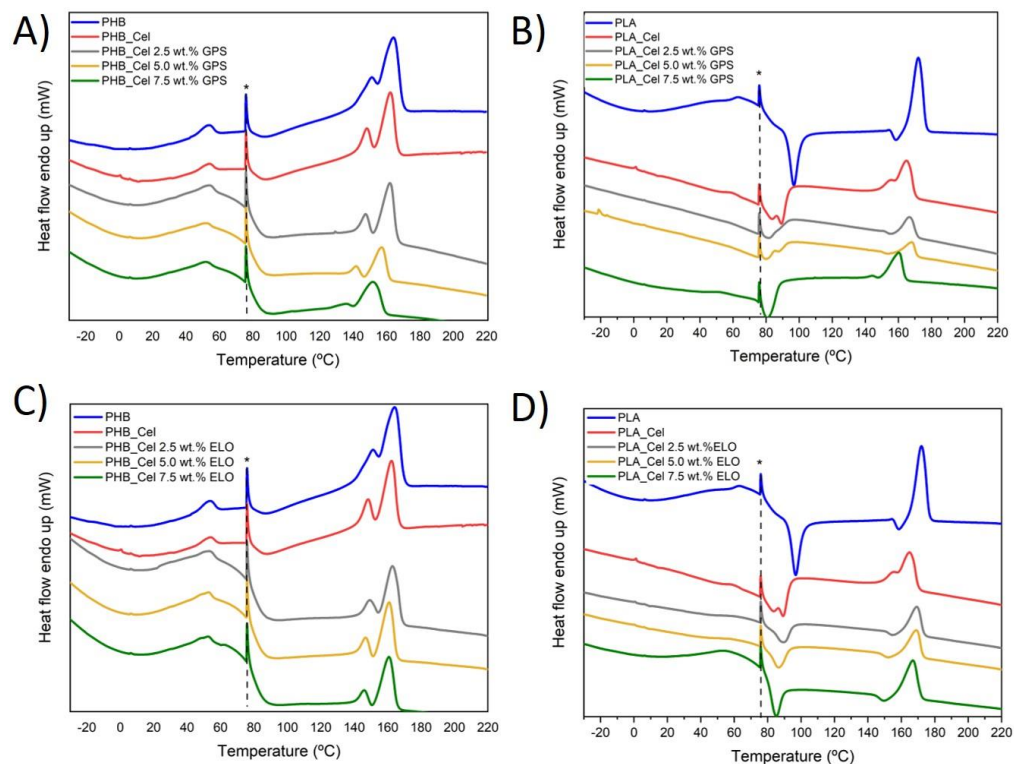

**Figure S2.** Differential scanning calorimetry curves of PHB- (A,C) and PLA-based composites (B,D) without and with different loads of GPS and ELO additives. \* The peaks at 76 °C present in all samples are due to an equipment artefact.

### Thermogravimetric Analysis

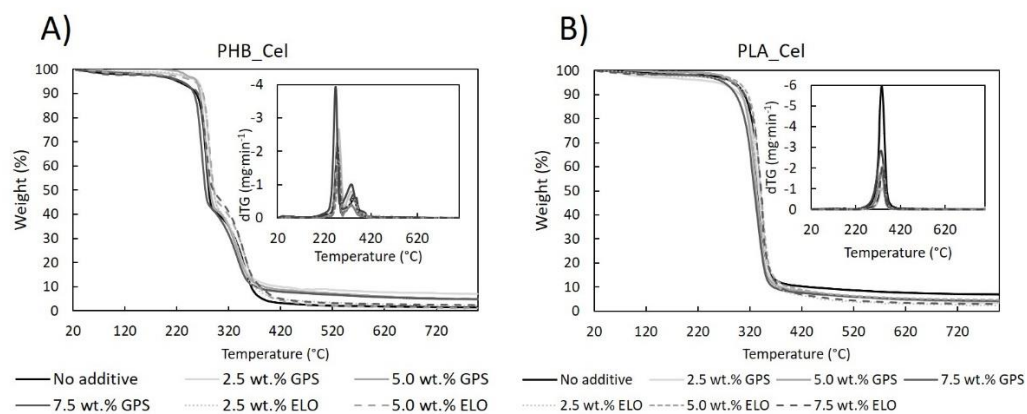

**Figure S3.** Thermogravimetric and derivative curves of PHB- (A) PLA-based composites (B) without and with different loads of GPS and ELO additives.
